# Supplementary material
Source: PubMed Central journal article supplement (PMC11515937)
Supplement: 10-1055-a-2061-6954-2022-10-1733.pdf [file 10-1055-a-2061-6954-2022-10-1733.pdf]

Zusatzmaterial

Tabelle S1. Ausgewählte ICD-Codes mit Bezug zu den mikrovaskulären Komplikationen des Diabetes

| Kategorie                                                   |                                                                       | ICD-Codes                                                                      |
|-------------------------------------------------------------|-----------------------------------------------------------------------|--------------------------------------------------------------------------------|
| Diabetische Retinopathie                                    |                                                                       |                                                                                |
| Kategorie I                                                 |                                                                       |                                                                                |
| Diagnose der Komplikation mit explizitem Bezug zu Diabetes  | H36.0                                                                 | Retinopathia diabetica                                                         |
| Kategorie II                                                |                                                                       |                                                                                |
| Diagnose der Komplikation ohne expliziten Bezug zu Diabetes | H35.0                                                                 | Retinopathien des Augenhintergrunds                                            |
|                                                             | H35.2                                                                 | Sonstige Proliferative Retinopathie                                            |
|                                                             | H35.8                                                                 | Makulaödem                                                                     |
| Kategorie III                                               | E1x.3                                                                 | Diabetes mellitus mit Augenkomplikation                                        |
|                                                             | H43.1                                                                 | Glaskörperblutung                                                              |
|                                                             | H54.0                                                                 | Blindheit beider Augen Blindheit                                               |
|                                                             | H54.1                                                                 | Blindheit eines Auges, Sehschwäche des anderen Auges                           |
|                                                             | H54.4                                                                 | Blindheit eines Auges                                                          |
|                                                             | H26.9                                                                 | Katarakt, nicht näher bezeichnet                                               |
|                                                             | H35.3                                                                 | Degeneration der Makula                                                        |
|                                                             | H35.6                                                                 | Netzhautblutung                                                                |
|                                                             | H36.8                                                                 | Sonstige Affektionen der Netzhaut bei anderenorts klassifizierten Krankheiten  |
| Diabetische Polyneuropathie                                 |                                                                       |                                                                                |
| Kategorie I                                                 | G63.2                                                                 | Diabetische Polyneuropathie                                                    |
| Kategorie II                                                | G62.9                                                                 | Polyneuropathie, nicht näher bezeichnet                                        |
|                                                             | G63.3                                                                 | Polyneuropathie bei sonstigen endokrinen und Stoffwechselkrankheiten           |
| Kategorie III                                               | E1x.4                                                                 | Diabetes mellitus: Mit neurologischen Komplikationen                           |
|                                                             | E1x.74                                                                | Diabetes mellitus: Mit diabetischem Fußsyndrom, nicht als entgleist bezeichnet |
|                                                             | E1x.75                                                                | Diabetes mellitus: Mit diabetischem Fußsyndrom, als entgleist bezeichnet       |
|                                                             | L89.x7                                                                | Dekubitalgeschwür und Druckzone; Ferse                                         |
|                                                             | M86.x7                                                                | Osteomyelitis; Knöchel und Fuß                                                 |
|                                                             | R02.07                                                                | Gangrän, anderenorts nicht klassifiziert; Knöchelregion, Fuß und Zehen         |
|                                                             | Z89.4                                                                 | Verlust des Fußes und des Knöchels, einseitig                                  |
| Z89.5                                                       | Verlust der unteren Extremität unterhalb oder bis zum Knie, einseitig |                                                                                |
| Diabetisches Fußsyndrom                                     |                                                                       |                                                                                |
| Kategorie I                                                 | E1x.74                                                                | Diabetes mellitus: Mit diabetischem Fußsyndrom, nicht als entgleist bezeichnet |
|                                                             | E1x.75                                                                | Diabetes mellitus: Mit diabetischem Fußsyndrom, als entgleist bezeichnet       |
|                                                             | M14.27                                                                | Diabetische Arthropathie: Knöchel und Fuß                                      |
|                                                             | M14.67                                                                | Neuropathische Arthropathie: Knöchel und Fuß                                   |
| Kategorie II                                                | L89.x7                                                                | Dekubitalgeschwür und Druckzone; Ferse                                         |
|                                                             | M86.x7                                                                | Osteomyelitis; Knöchel und Fuß                                                 |
|                                                             | R02.07                                                                | Gangrän, anderenorts nicht klassifiziert; Knöchelregion, Fuß und Zehen         |
|                                                             | Z89.4                                                                 | Verlust des Fußes und des Knöchels, einseitig                                  |
|                                                             | Z89.5                                                                 | Verlust der unteren Extremität unterhalb oder bis zum Knie, einseitig          |
| Kategorie III                                               | E1x.5                                                                 | Diabetes mellitus: Mit peripheren vaskulären Komplikationen                    |
|                                                             | I79.2                                                                 | Periphere Angiopathie bei anderenorts klassifizierten Krankheiten              |

ICD: Internationale statistische Klassifikation der Krankheiten und verwandter Gesundheitsprobleme
